# Supplementary material
Source: publisher site journal article supplement (https://www.degruyterbrill.com/publication/journal_key/WVTE/downloadAsset/WVTE_Introduction%20to%20World%20Vocational%20and%20Technical%20Education.pdf)
Supplement: Supplementary file 1 [file WVTE_Introduction%20to%20World%20Vocational%20and%20Technical%20Education.pdf]

# Preface to *World Vocational and Technical Education*

In response to the trends in technological innovation, industrial upgrading, and labor market transformation, countries worldwide are committed to developing a more equitable, inclusive, and sustainable vocational education system, with an ongoing emphasis on global exchange and cooperation in vocational education. In line with the hosting of the World Vocational and Technical Education Development Conference and the establishment of the World TVET League, *World Vocational and Technical Education* has officially been launched.

*World Vocational and Technical Education*, sponsored by Tianjin University of Technology and Education and published by De Gruyter (Germany), is the only official journal of the World Vocational and Technical Education Development Conference and the World TVET League. As an international, interdisciplinary, and open-access academic journal in vocational and technical education, it adheres to core principles of mutual learning, co-development, and shared benefit. The journal gathers expertise from global educational and industrial sectors, and focuses on key issues in high-quality development of vocational and technical education, aiming to infuse new momentum into the international advancement of vocational and technical education.

*World Vocational and Technical Education* is entrusted with the significant mission of comprehensively and accurately presenting the outcomes of the World Vocational and Technical Development Conference. The grand success of the World Vocational and Technical Education Development Conference and the official establishment of the World TVET League signal a new phase of cooperation and exchange in vocational education. The conference's and the league's valuable outcomes and insights need dissemination through an authoritative and professional platform, a role that *World Vocational and Technical Education* is honored to fulfill. The journal will promptly publish conference summaries, research reports, and exemplary papers, providing global readers with timely access to the latest developments and cutting-edge insights from the conference. Additionally, we will invite participating experts and scholars to contribute column articles to share their insights and experience, providing substantial theoretical and intellectual support for vocational education practice.

The journal aspires to be a bridge and link for collaboration and exchange within the global vocational education community. Committed to openness, inclusiveness, and innovation, it will closely monitor and provide in-depth analyses of the latest global vocational education policies, pioneering reforms, and impactful practices. It will showcase the unique characteristics, defining features, and core strengths of vocational education systems across different countries, advance international mutual learning and resource sharing, and collaboratively write a new

chapter in global vocational education cooperation. Importantly, the journal emphasizes the global promotion and sharing of outcomes, ensuring that outstanding research and best practices transcend borders, benefit the international community, accelerate the exchange of knowledge, and foster collaborative growth in vocational education. Together, we aim to elevate global vocational education to new levels of integration and prosperity.

The journal is dedicated to gathering global insights, disseminating research findings, fostering practical innovation, and growing into a significant contributor to the reform and advancement of vocational and technical education. In the context of the digital age, professional journals within this domain hold significant importance. This publication serves as a platform for experts and scholars in vocational and technical education from diverse countries and regions to exchange research outcomes and experience, thereby facilitating international academic collaboration. Beyond its role as an academic forum, the journal acts as a catalyst for practical innovation. By publishing and discussing scholarly articles, practitioners in vocational and technical education can access the latest theoretical frameworks, practical experience, and pedagogical strategies. This cross-cultural and cross-regional collaboration will invigorate the global vocational and technical education landscape, ultimately contributing to the future trajectory of education.

Articles are written to reflect the times, and journals are created to promote important causes! *World Vocational and Technical Education* has indeed emerged at a moment of great

opportunity, shaped by current trends. With this foundation, we will remain dedicated to high-quality development, continually innovate our journal's concepts and models, and keep pace with the latest developments and forefront trends in vocational education. Our mission is to foster more in-depth, expansive, and impactful vocational education research, advancing the ideas and practices of vocational education to new heights, and contributing both wisdom and strength to building a community with a shared future for mankind.

Zheng Qingchun

Editor-in-Chief

Tianjin University of Technology and Education, China
